# Supplementary material
Source: Springer Nature journal article supplement (https://www.springermedizin.de/resource/supplementary/12957_2011_1128_MOESM8_ESM.pdf/9561916)

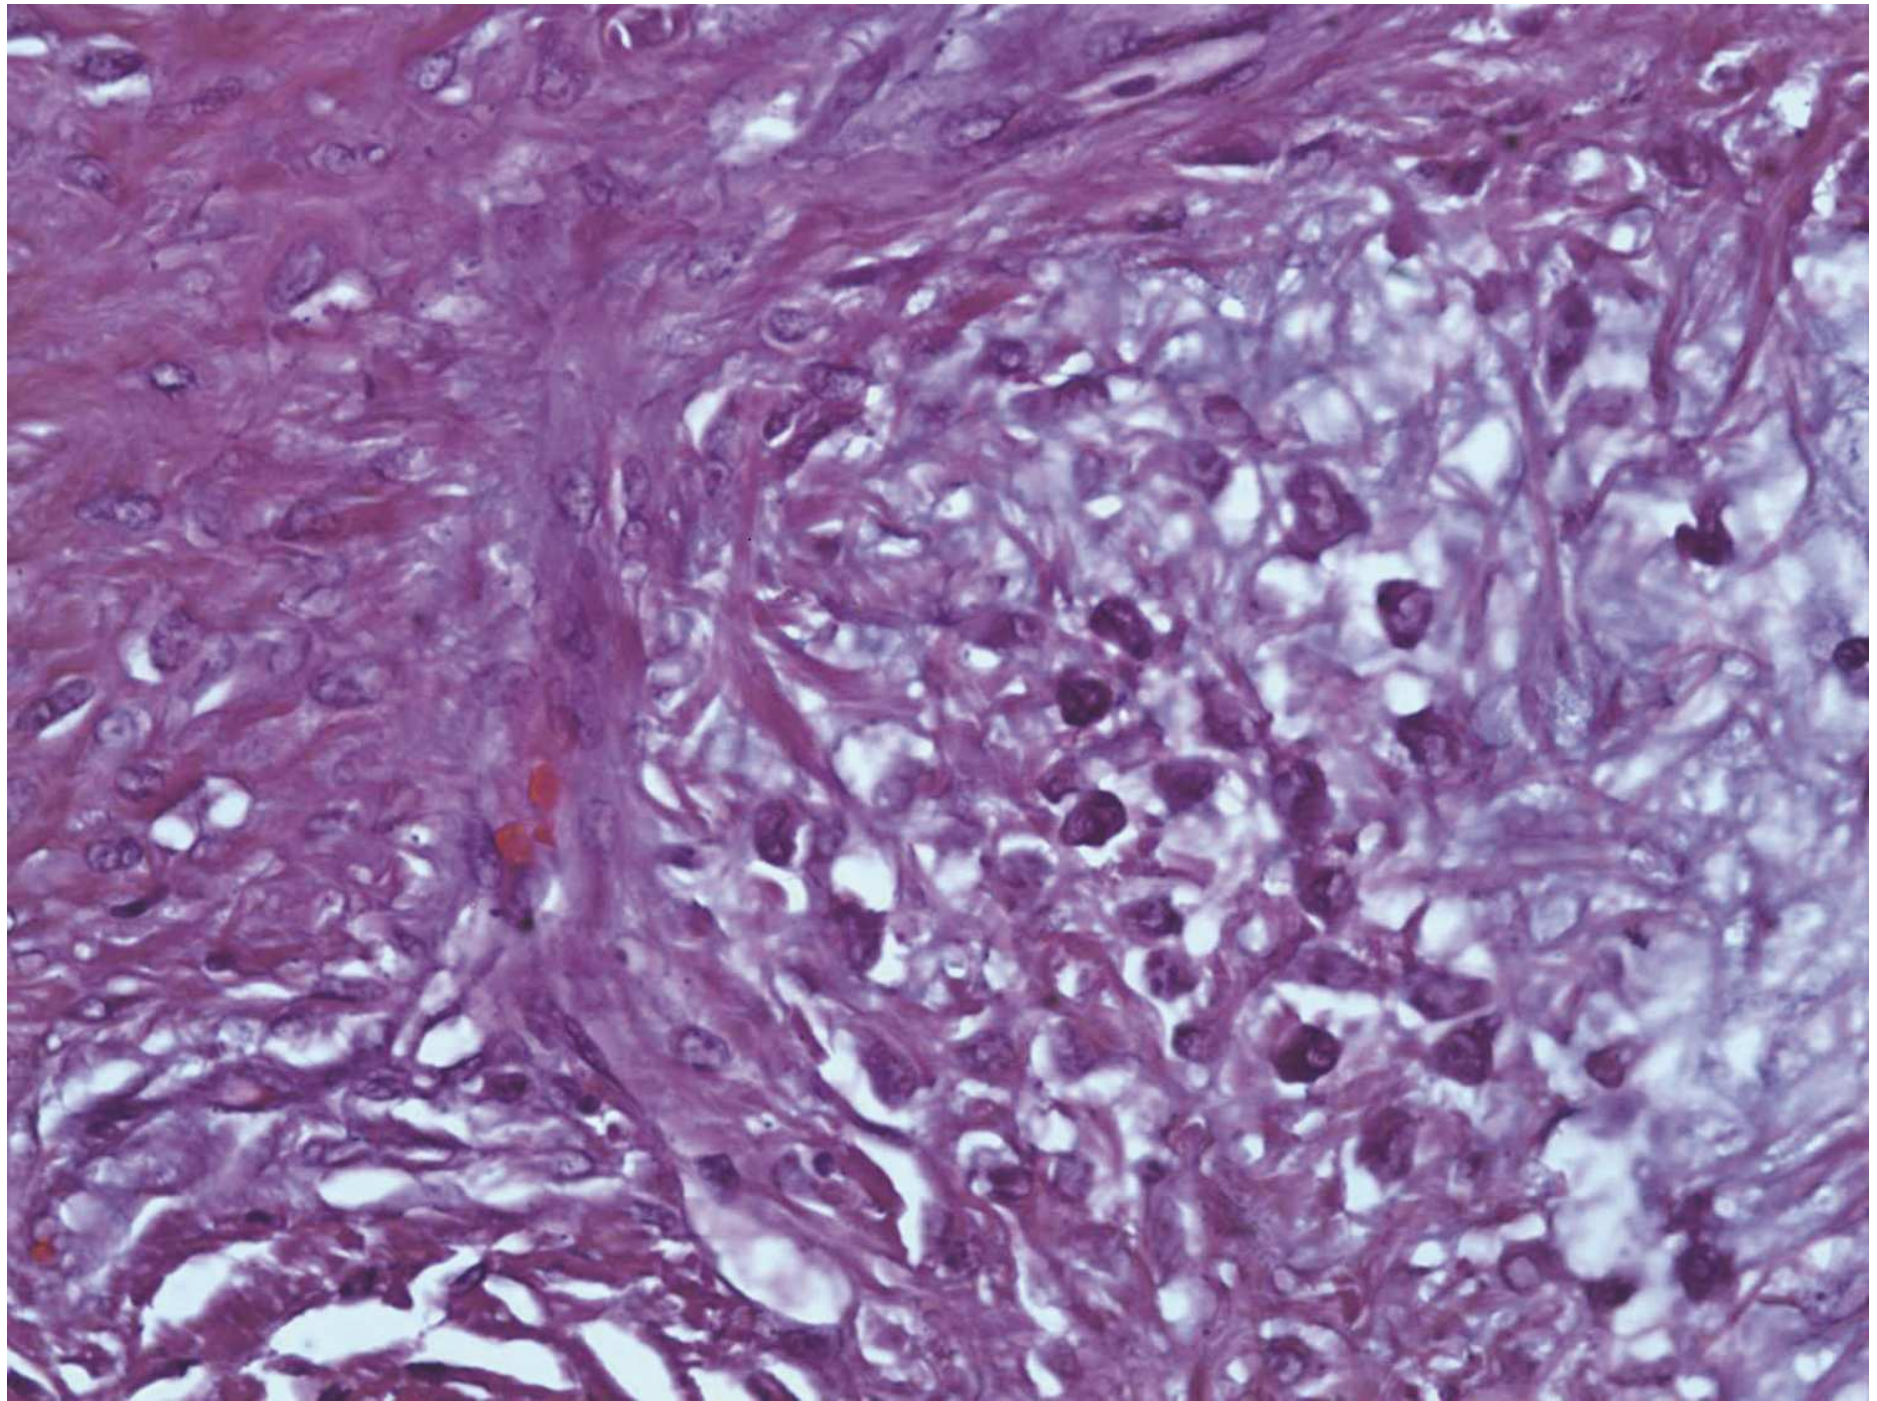

Supplement: MOESM8 [file 9561916]
